# Supplementary material for: Microbial Ecology of Sheep Milk, Artisanal Feta, and Kefalograviera Cheeses. Part II: Technological, Safety, and Probiotic Attributes of Lactic Acid Bacteria Isolates
Source: MDPI journal article supplement (doi:10.3390/foods11030459), 2022-02-03
Supplement: s1 [file s1]

**Table S1.** Origin of the strains included in the present study.

| Species                  | Origin                                                              |                                                                                                                                                         |                                       |                                                            |                                                      |
|--------------------------|---------------------------------------------------------------------|---------------------------------------------------------------------------------------------------------------------------------------------------------|---------------------------------------|------------------------------------------------------------|------------------------------------------------------|
|                          | Sheep Milk                                                          | Feta                                                                                                                                                    |                                       | Kefalograviera                                             |                                                      |
|                          |                                                                     | Early Ripening                                                                                                                                          | Late Ripening                         | Early Ripening                                             | Late Ripening                                        |
| <i>E. faecium</i>        | 2647, 2667, 2669,<br>2670, 2671, 2672,<br>2686, 2690, 2691,<br>2695 | 2585, 2586, 2587,<br>2588, 2591, 2592,<br>2593, 2594, 2595,<br>2598, 2599, 2600,<br>2601, 2603, 2642,<br>2643, 2644                                     | 2711, 2715                            | 2757, 2577, 2578,<br>2579, 2580, 2581,<br>2582, 2583, 2636 | 2717, 2718, 2720,<br>2721, 2723, 2724,<br>2725, 2758 |
| <i>E. faecalis</i>       | 2651                                                                | 2602                                                                                                                                                    |                                       |                                                            | 2722                                                 |
| <i>Lc. lactis</i>        | 2649, 2658, 2692,<br>2697, 2698, 2699,<br>2700                      |                                                                                                                                                         |                                       |                                                            |                                                      |
| <i>Ln. mesenteroides</i> | 2703, 2704, 2705,<br>2706                                           | 2604                                                                                                                                                    |                                       | 2576                                                       |                                                      |
| <i>Lp. pentosus</i>      | 2662, 2693                                                          |                                                                                                                                                         |                                       |                                                            |                                                      |
| <i>Lp. plantarum</i>     | 2648, 2650, 2653,<br>2654, 2656, 2668                               | 2589, 2590, 2605,<br>2606, 2607, 2608,<br>2609, 2610, 2611,<br>2612, 2614, 2615,<br>2617, 2618, 2619,<br>2637, 2638, 2639,<br>2640, 2641, 2645,<br>2646 |                                       | 2584                                                       |                                                      |
| <i>Lt. curvatus</i>      |                                                                     |                                                                                                                                                         | 2708, 2709, 2716,<br>2728, 2734, 2735 |                                                            |                                                      |
| <i>Lv. brevis</i>        | 2659, 2660, 2661,<br>2663, 2664, 2665,                              | 2596, 2597                                                                                                                                              |                                       | 2624, 2625, 2626,<br>2627, 2628, 2629,                     | 2757, 2759, 2760,<br>2762, 2763                      |

|                             |                                                                                                               |      |                                                                                                                     |                                       |                                                                                 |
|-----------------------------|---------------------------------------------------------------------------------------------------------------|------|---------------------------------------------------------------------------------------------------------------------|---------------------------------------|---------------------------------------------------------------------------------|
|                             | 2666, 2682, 2684,<br>2685, 2687, 2688                                                                         |      |                                                                                                                     | 2630, 2631, 2632,<br>2633             |                                                                                 |
| <i>P. pentosaceus</i>       | 2652, 2655, 2657,<br>2673, 2674, 2675,<br>2676, 2677, 2678,<br>2679, 2680, 2681,<br>2683, 2689, 2694,<br>2696 | 2616 | 2748, 2749, 2752,<br>2753, 2754                                                                                     | 2620, 2621, 2622,<br>2623, 2634, 2635 | 2761                                                                            |
| <i>W. paramesenteroides</i> | 2701, 2702                                                                                                    | 2613 | 2707, 2710, 2712,<br>2713, 2714, 2726,<br>2727, 2729, 2730,<br>2731, 2732, 2733,<br>2746, 2747, 2750,<br>2751, 2755 |                                       | 2719, 2736, 2737,<br>2738, 2739, 2740,<br>2741, 2742, 2743,<br>2744, 2745, 2756 |

*E.*: *Enterococcus*; *Lc.*: *Lactococcus*; *Ln.*: *Leuconostoc*; *Lp.*: *Lactiplantibacillus*; *Lt.*: *Latilactobacillus*; *Lv.*: *Levilactobacillus*; *P.*: *Pediococcus*; *W.*: *Weissella*.
