# Supplementary material for: Microbial Ecology of Sheep Milk, Artisanal Feta, and Kefalograviera Cheeses. Part II: Technological, Safety, and Probiotic Attributes of Lactic Acid Bacteria Isolates
Source: MDPI journal article supplement (doi:10.3390/foods11030459), 2022-02-03
Supplement: s1 [file s1]

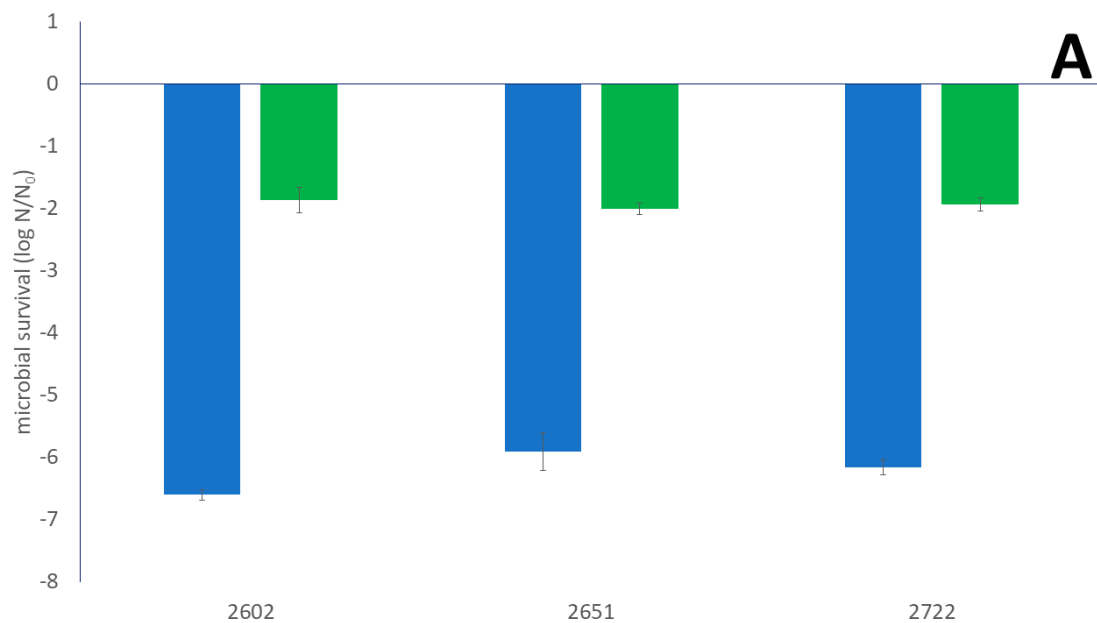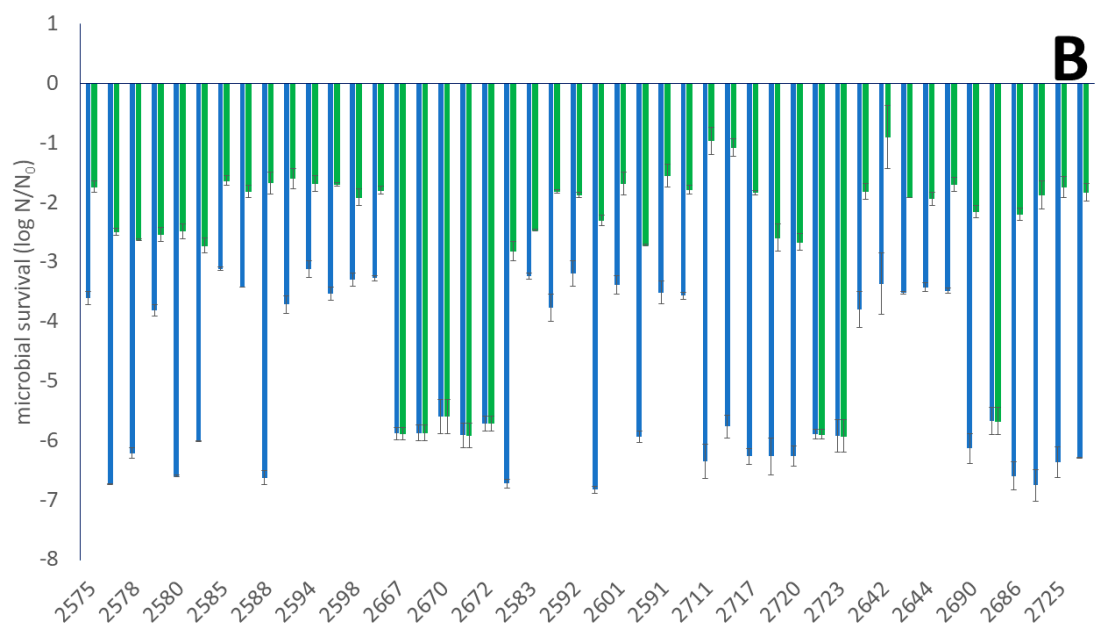

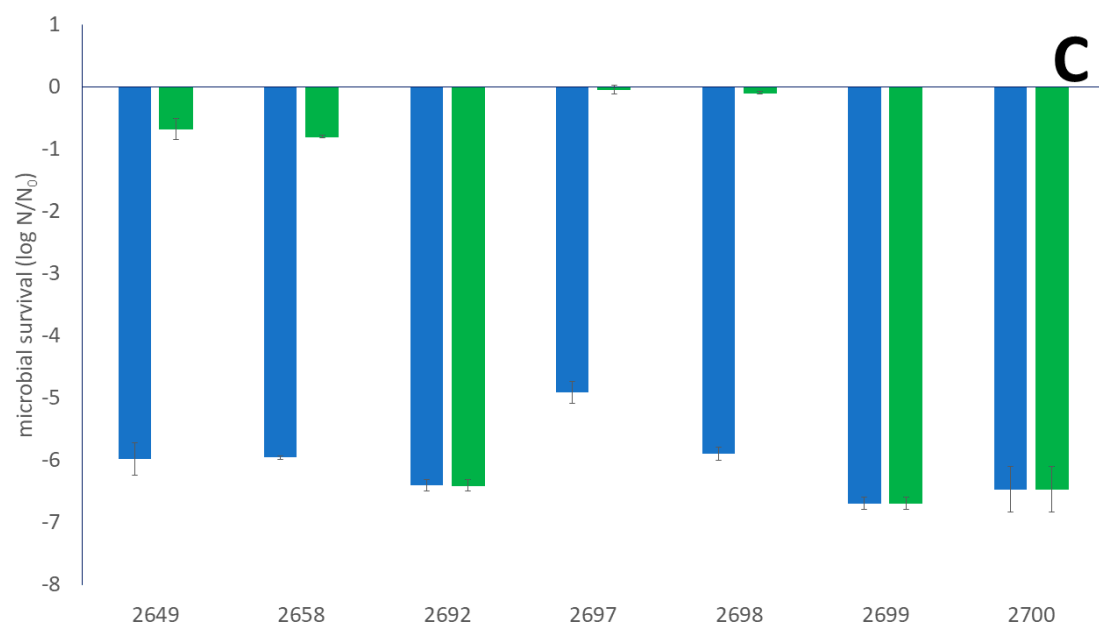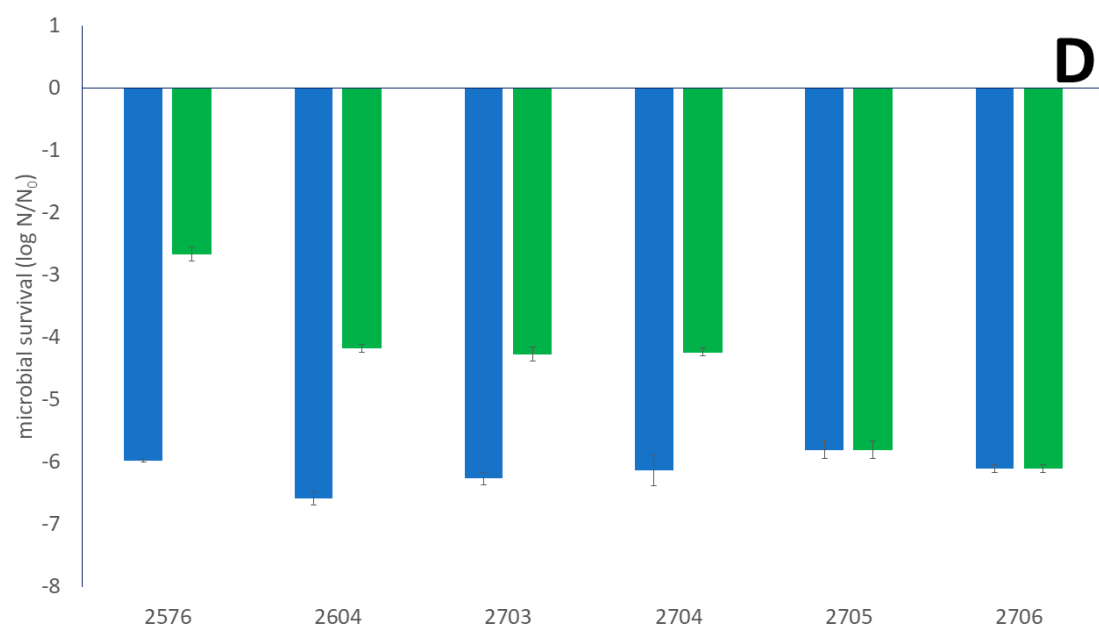

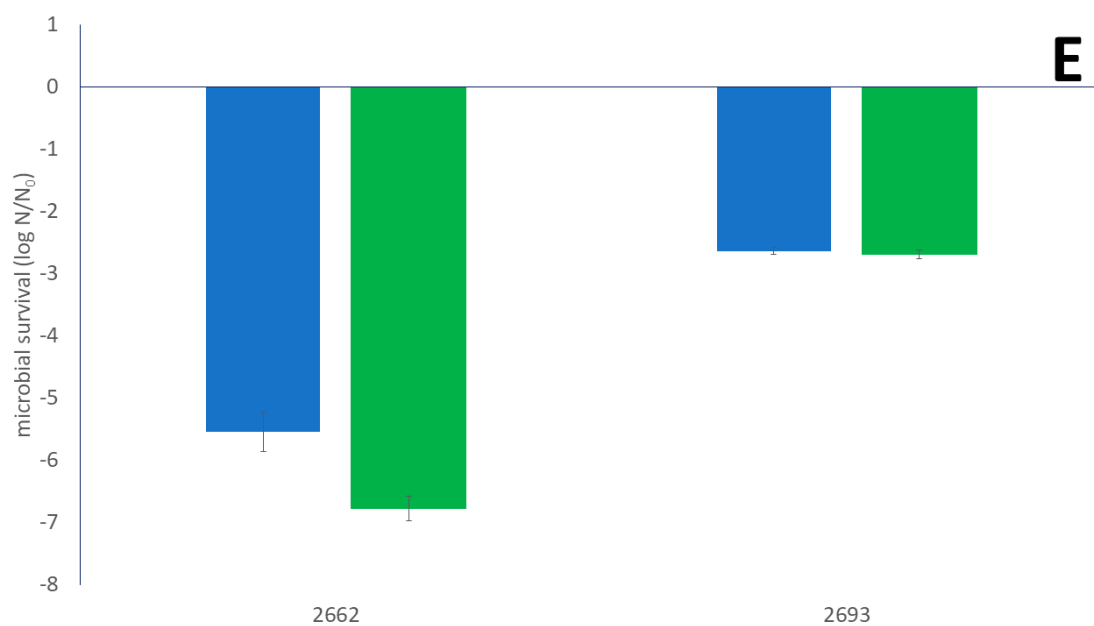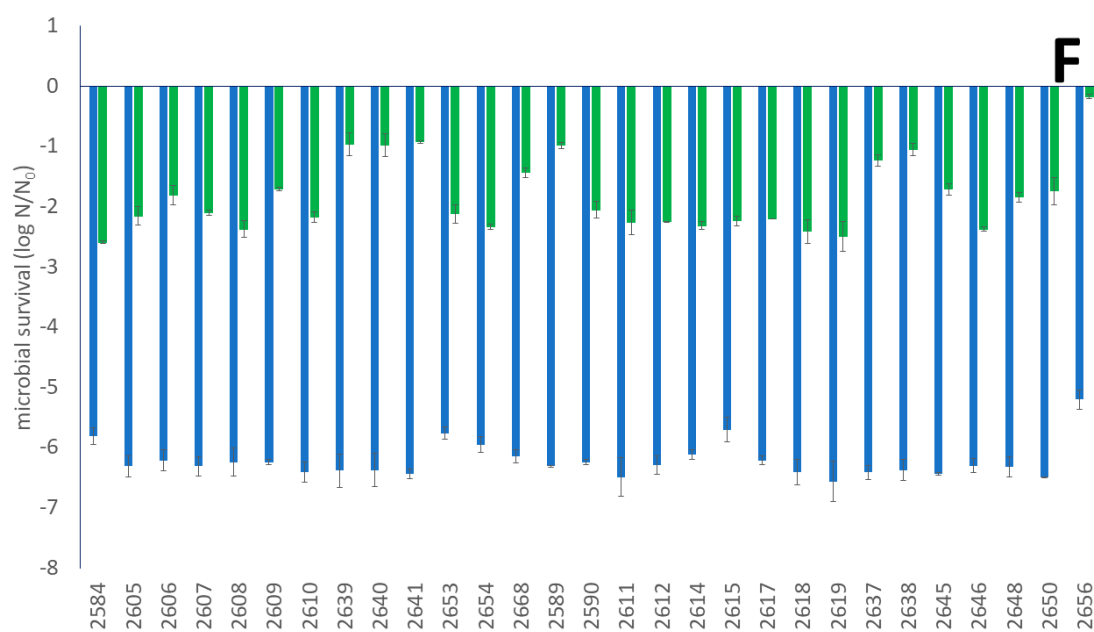

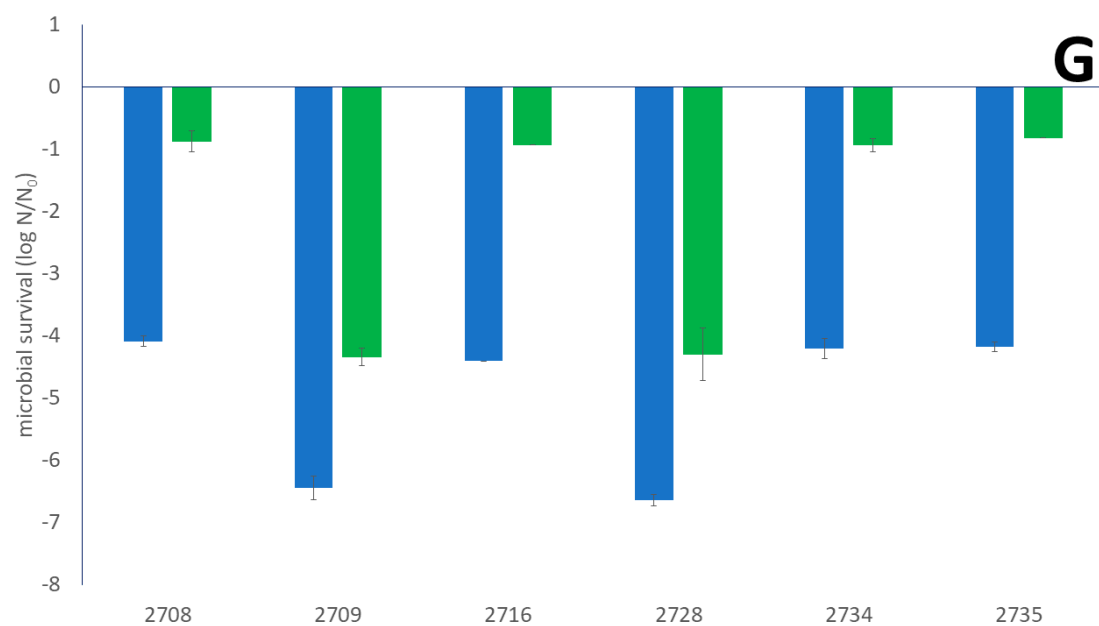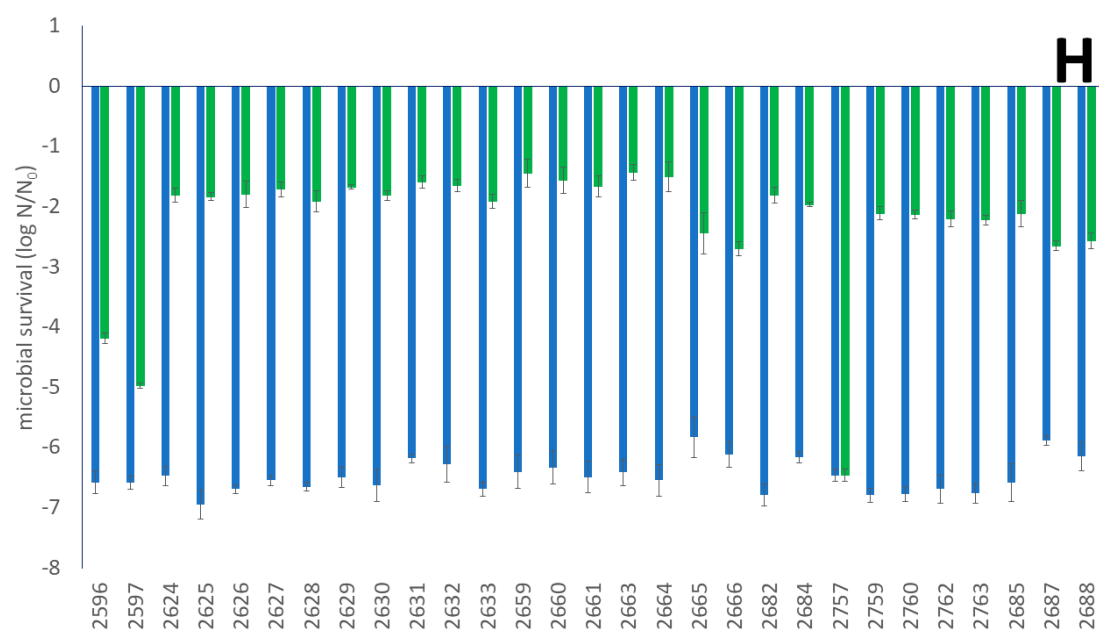

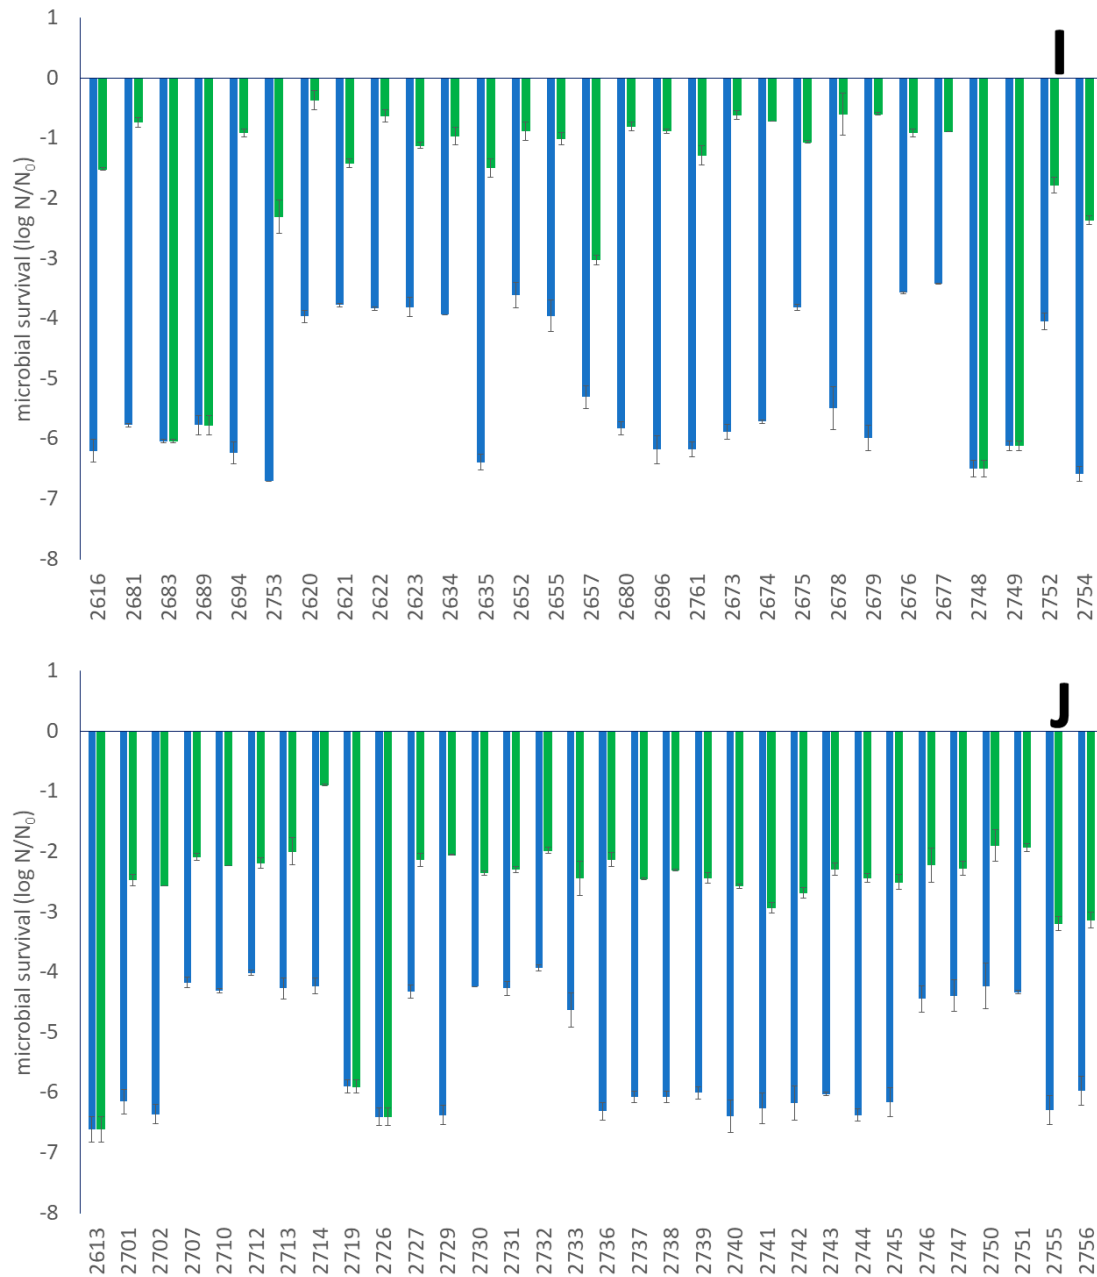

**Figure S1.** Microbial survival (in log N/N<sub>0</sub>) after exposure of *E. faecalis* (A), *E. faecium* (B), *Lc. lactis* (C), *Ln. mesenteroides* (D), *Lp. pentosus* (E), *Lp. plantarum* (F), *Lt. curvatus* (G), *Lv. brevis* (H), *P. pentosaceus* (I) and *W. paramesenteroides* (J) strains included in the present study to PBS buffer adjusted to pH 2 (blue) or 3 (green) with HCl and incubation at 37 °C for 3 h. N: microbial population after incubation; N<sub>0</sub>: initial microbial population.

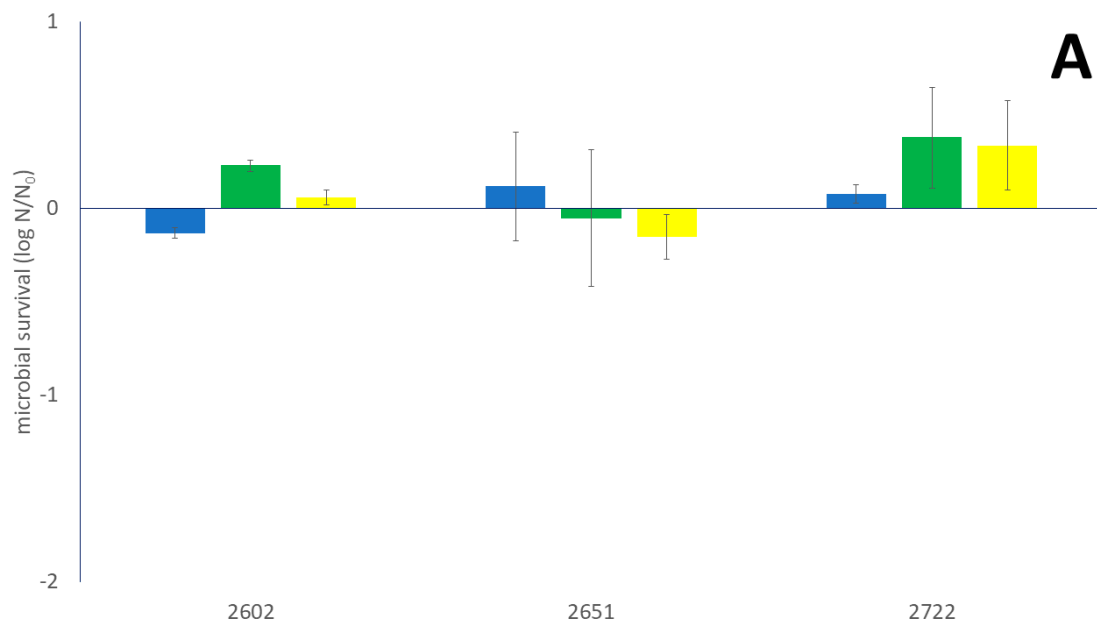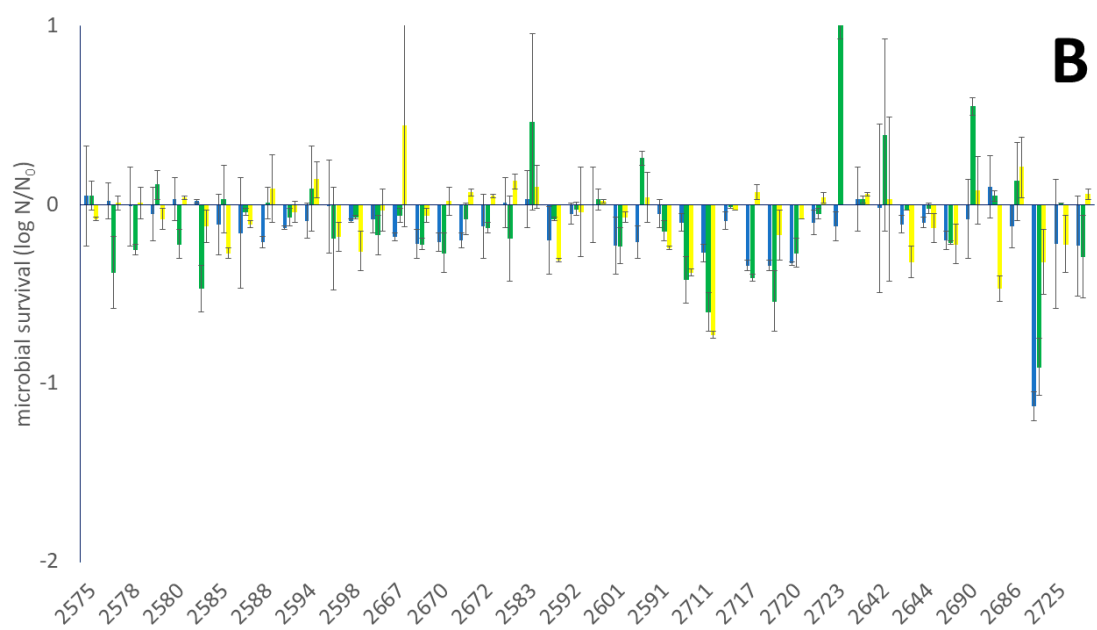

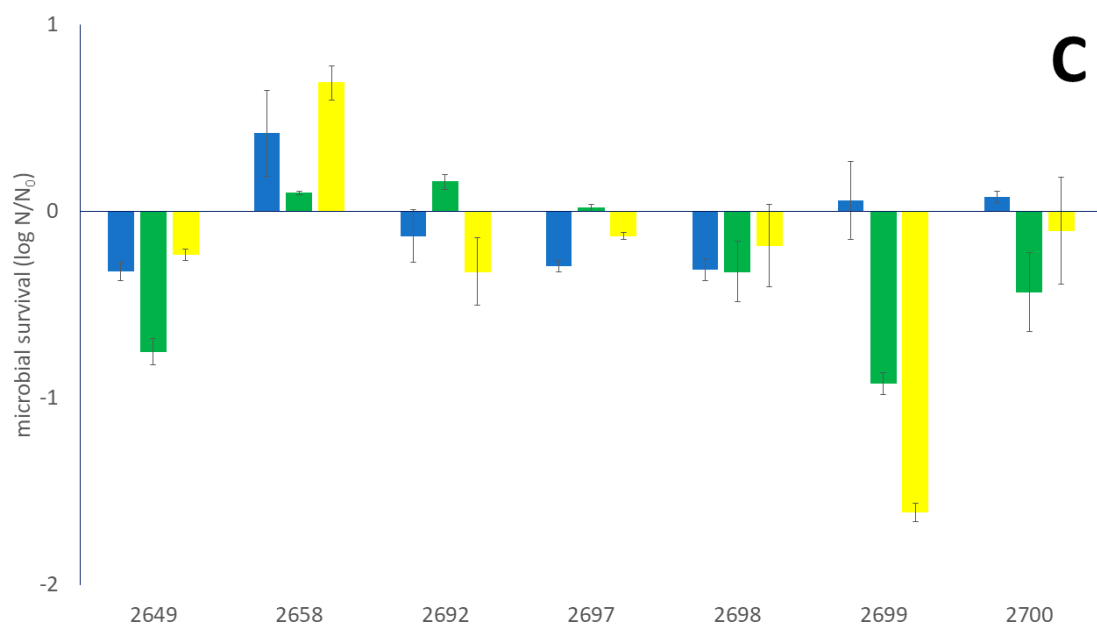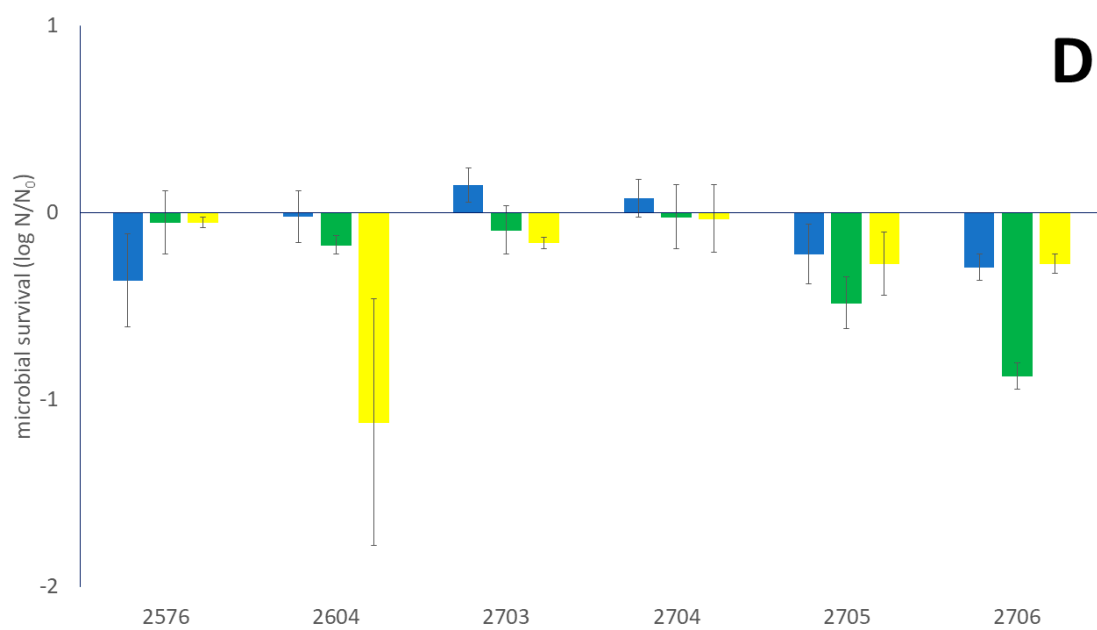

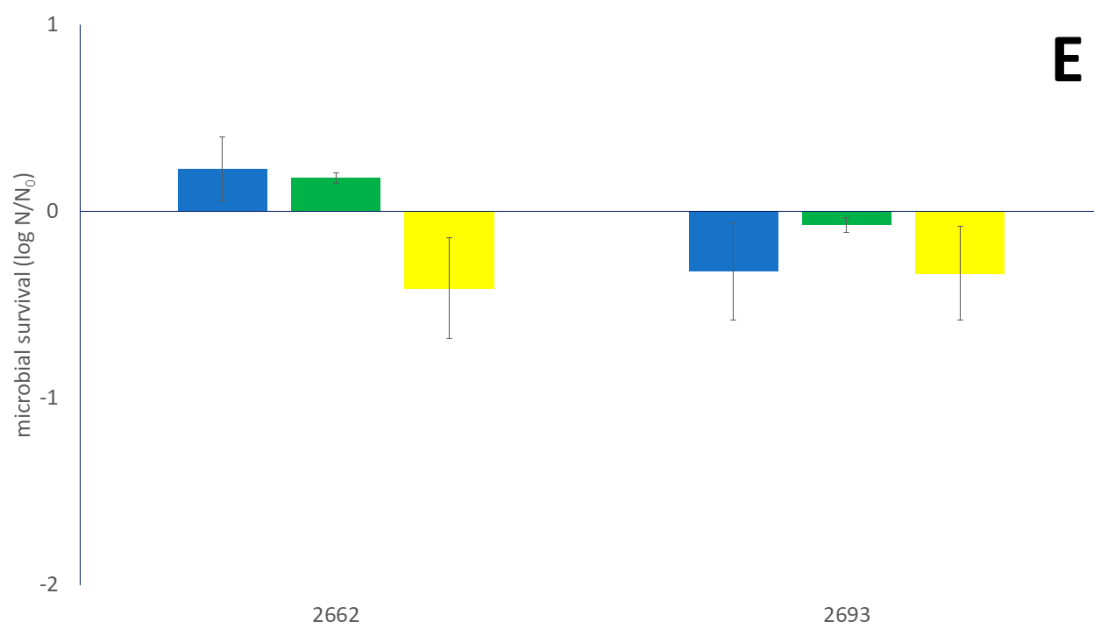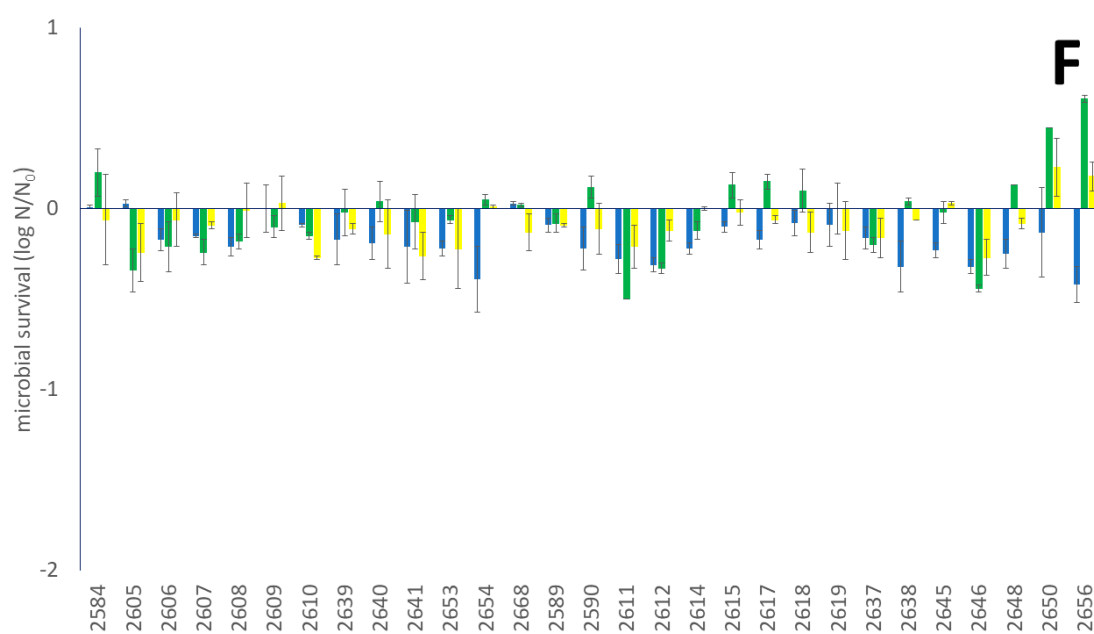



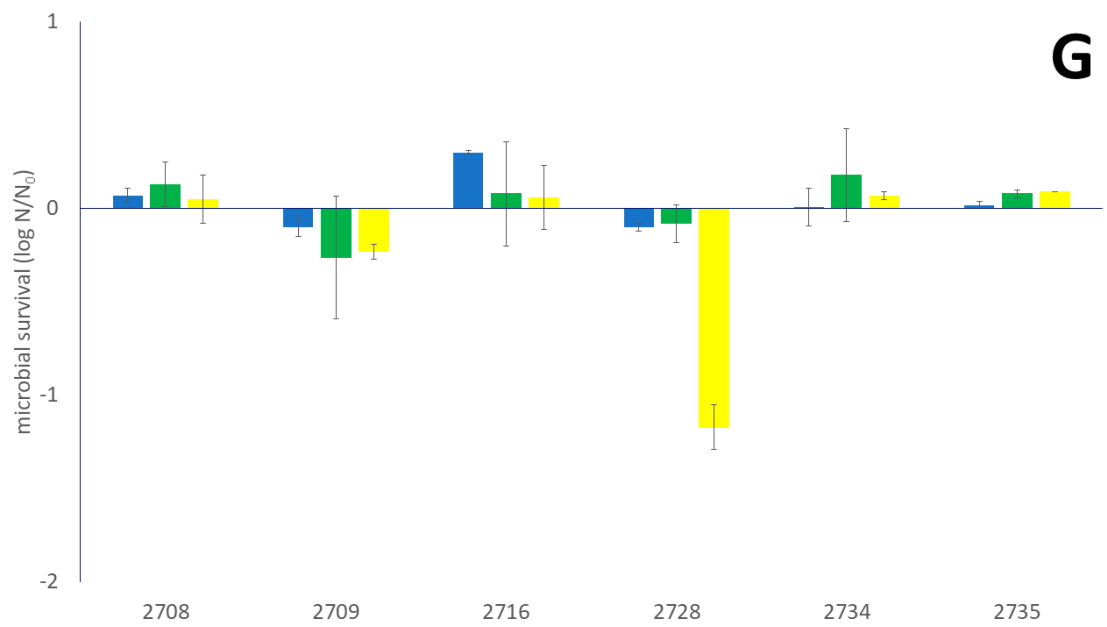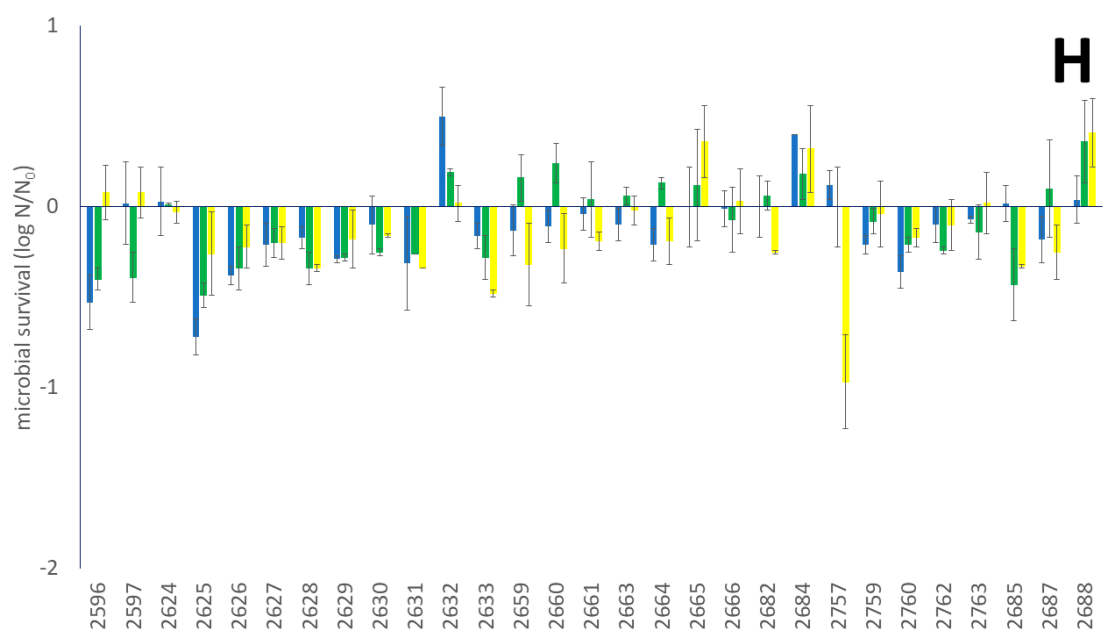

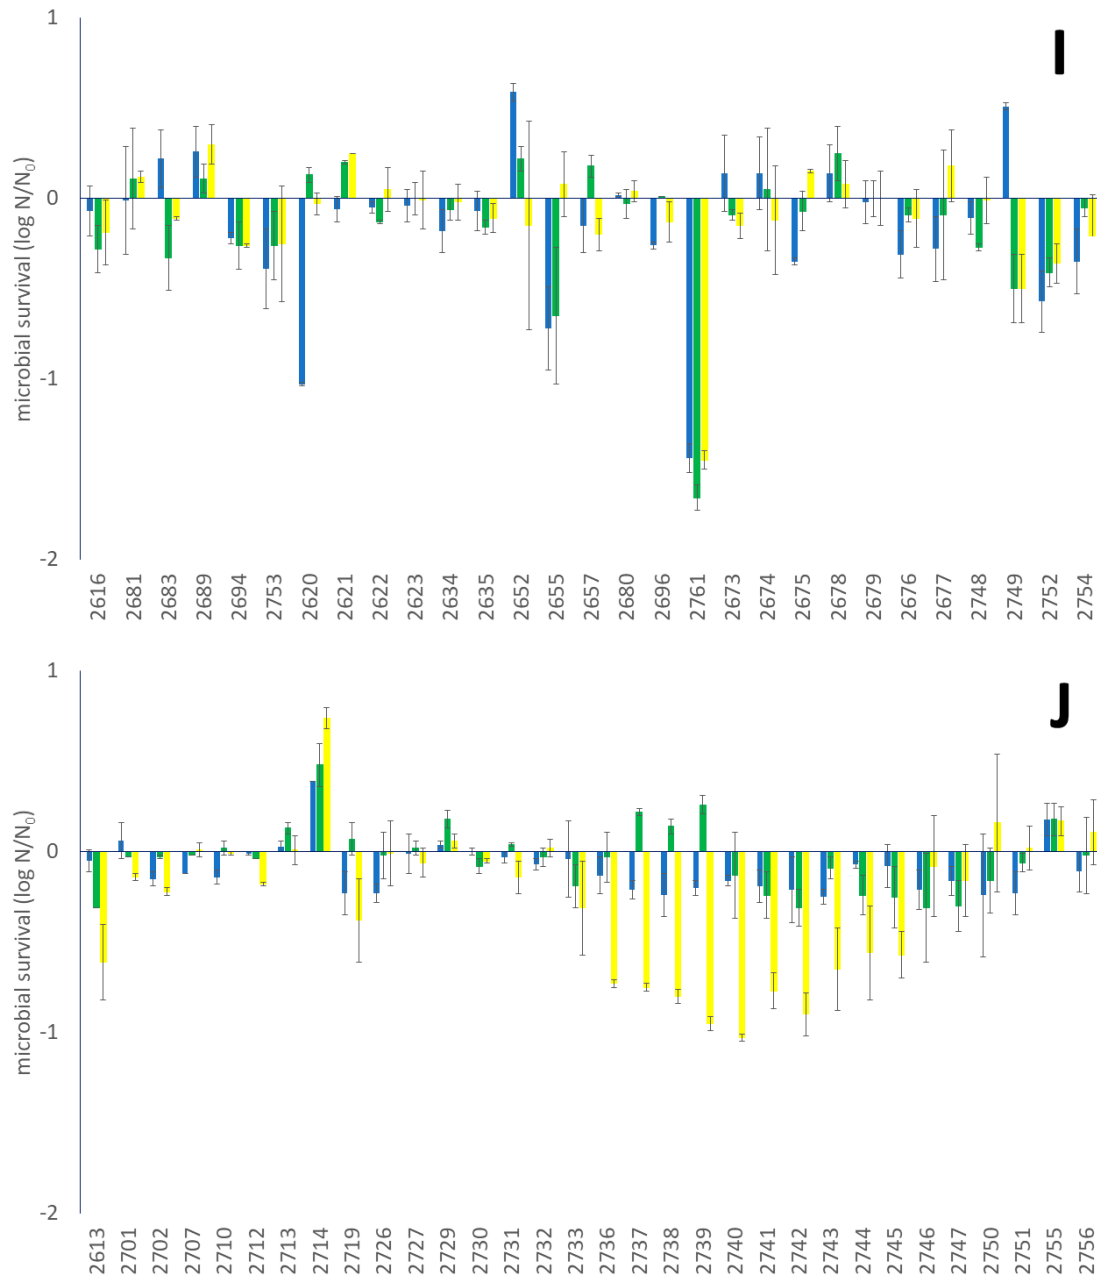

**Figure S2.** Microbial survival (in log N/N<sub>0</sub>) after exposure of *E. faecalis* (A), *E. faecium* (B), *Lc. lactis* (C), *Ln. mesenteroides* (D), *Lp. pentosus* (E), *Lp. plantarum* (F), *Lt. curvatus* (G), *Lv. brevis* (H), *P. pentosaceus* (I) and *W. paramesenteroides* (J) strains included in the present study to PBS buffer, pH 8, containing 0.5% (blue), 1.0% (green) or 2.0% (yellow) (w/v) bile bovine and incubation at 37 °C for 4 h. N: microbial population after incubation; N<sub>0</sub>: initial microbial population.
